CORRECTION

# Correction: *mlh3* mutations in baker's yeast alter meiotic recombination outcomes by increasing noncrossover events genome-wide

The *PLOS Genetics* Staff

## Notice of republication

This article was republished on October 5, 2017, to correct a global change where instances of “*MLH3*” were incorrectly typeset as “*mlh3*”. The publisher apologizes for the errors. Please download this article again to view the correct version. The originally published, uncorrected article and the republished, corrected articles are provided here for reference.

## Supporting information

**S1 File. Originally published, uncorrected article.**

(PDF)

**S2 File. Republished, corrected article.**

(PDF)

## Reference

1. Al-Sweel N, Raghavan V, Dutta A, Ajith VP, Di Vietro L, Khondakar N, et al. (2017) *mlh3* mutations in baker's yeast alter meiotic recombination outcomes by increasing noncrossover events genome-wide. *PLoS Genet* 13(8): e1006974. <https://doi.org/10.1371/journal.pgen.1006974> PMID: 28827832

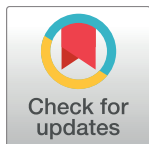

## OPEN ACCESS

**Citation:** The *PLOS Genetics* Staff (2017)

Correction: *mlh3* mutations in baker's yeast alter meiotic recombination outcomes by increasing noncrossover events genome-wide. *PLoS Genet* 13(10): e1007067. <https://doi.org/10.1371/journal.pgen.1007067>

**Published:** October 24, 2017

**Copyright:** © 2017 The PLOS Genetics Staff. This is an open access article distributed under the terms of the [Creative Commons Attribution License](https://creativecommons.org/licenses/by/4.0/), which permits unrestricted use, distribution, and reproduction in any medium, provided the original author and source are credited.
